# Supplementary material for: Development of bioactive short fiber-reinforced printable hydrogels with tunable mechanical and osteogenic properties for bone repair
Source: Royal Society of Chemistry journal article supplement (doi:10.1039/d3tb02924g), 2024-01-01
Supplement: d3tb02924g1.pdf [file d3tb02924g1.pdf]

## Supporting information

### Development of bioactive short fibers reinforced printable hydrogel with tunable mechanical and osteogenic properties for bone repair

Nafiseh Moghimi<sup>1,2\*</sup>, Meenakshi Kamaraj<sup>1</sup>, Fatemeh Zehtabi<sup>1</sup>, Saber Amin Yavari<sup>1,3</sup>, Mohammad Kohandel<sup>2</sup>, Ali khademhosseini<sup>1\*</sup>, Johnson V John<sup>1\*</sup>

<sup>1</sup> Terasaki Institute for Biomedical Innovations, Los Angeles, California, United States

<sup>2</sup> Mathematical Medicine Lab, University of Waterloo, Ontario, Canada

<sup>3</sup> Department of Orthopedics, University Medical Center Utrecht, Utrecht, The Netherlands

\* Correspondence should be addressed to:

Dr. Nafiseh Moghimi: [nafiseh.moghimi@terasaki.org](mailto:nafiseh.moghimi@terasaki.org)

Prof. Ali Khademhosseini: [khademh@terasaki.org](mailto:khademh@terasaki.org)

Dr. Johnson V. John: [jjohn@terasaki.org](mailto:jjohn@terasaki.org)

| <b>Bioink Composition</b> | <b>Nozzle Size</b> | <b>Extrusion Pressure kPa</b> | <b>Printing Temperature</b> | <b>Filament</b>             |
|---------------------------|--------------------|-------------------------------|-----------------------------|-----------------------------|
| <b>G10</b>                | <b>21</b>          | <b>180</b>                    | <b>25</b>                   | <b>Good</b>                 |
| <b>G7F10</b>              | <b>21</b>          | ----                          | ----                        | ----                        |
| <b>G8A2F10</b>            | <b>21</b>          | ----                          | ----                        | ----                        |
| <b>G7A3F10</b>            | <b>18</b>          | <b>60</b>                     | <b>27</b>                   | <b>Good</b>                 |
| <b>G8A2F5</b>             | <b>18</b>          | <b>60</b>                     | <b>25</b>                   | <b>Good</b>                 |
| <b>G8A2F10</b>            | <b>18</b>          | <b>80</b>                     | <b>27</b>                   | <b>Good</b>                 |
| <b>G8A2F20</b>            | <b>18</b>          | <b>140</b>                    | <b>28.5</b>                 | <b>Good</b>                 |
| <b>G8A2F30</b>            | <b>18</b>          | <b>160</b>                    | <b>29.5</b>                 | <b>Started to show nods</b> |

**Table 1:** Optimization of bioink with different parameters. The numbers beside each letter indicates the percentage of that component, for example G7A3F10 indicates GelMA 7%, Alginate 3% and Microfiber 10 mg/mL.

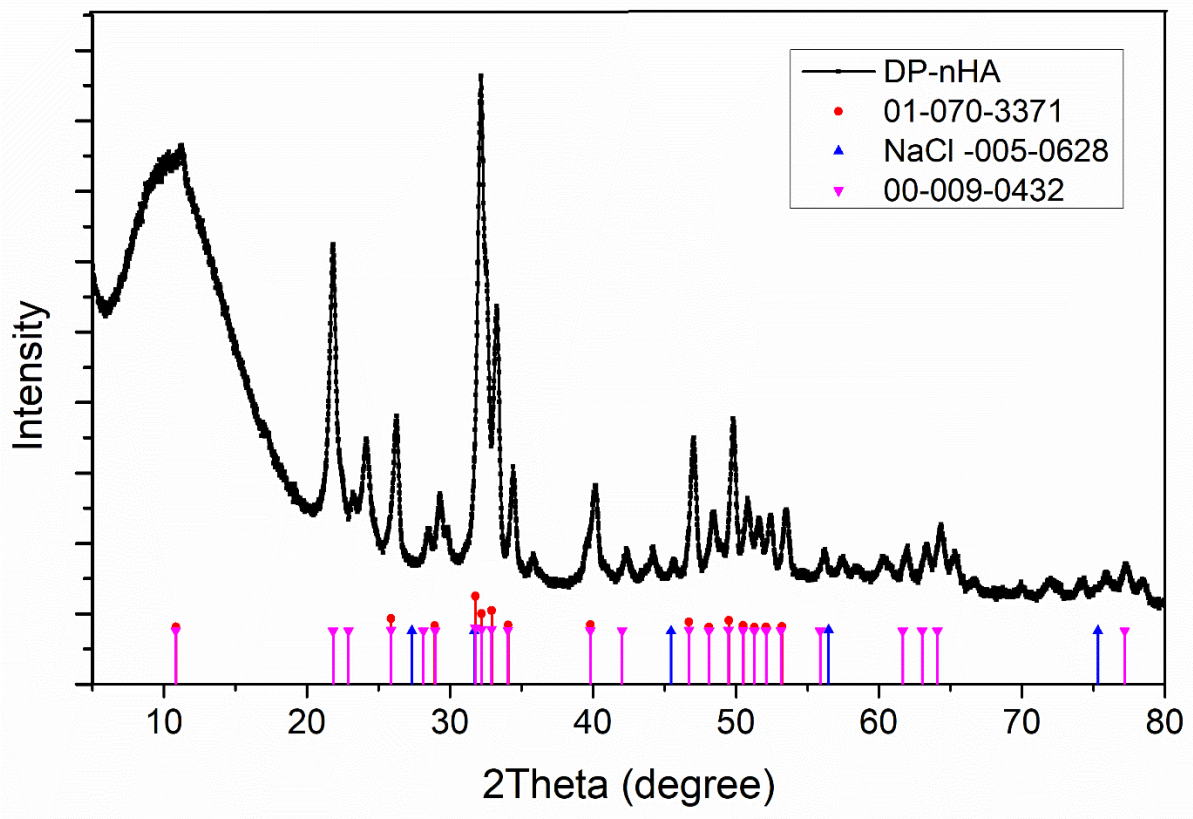

**Figure S1:** XRD diffraction pattern of hydroxyapatite nanoparticles coated PLA microfibers

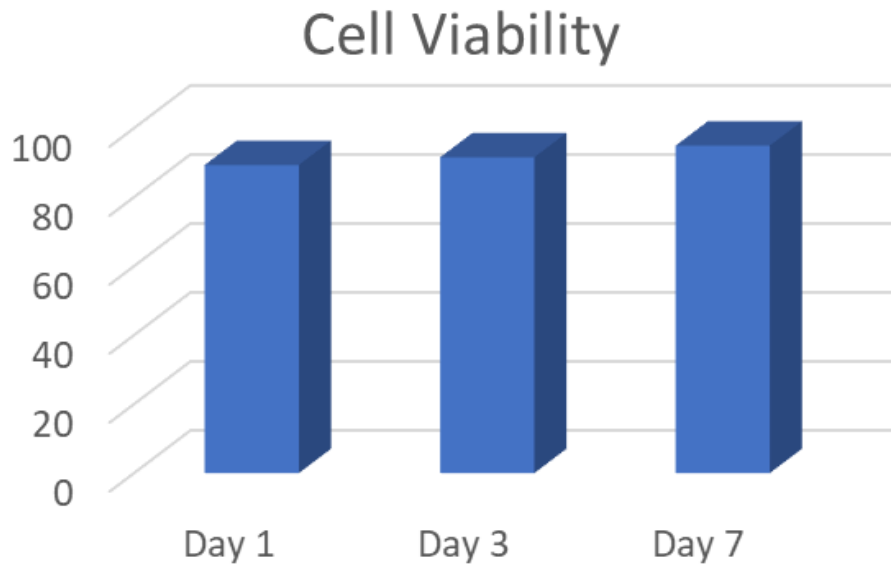

**Figure S2:** Quantitative histogram for cell viability at day 1, day 3 and day 7 after printing with cell laden bioink G8A2F20HA.

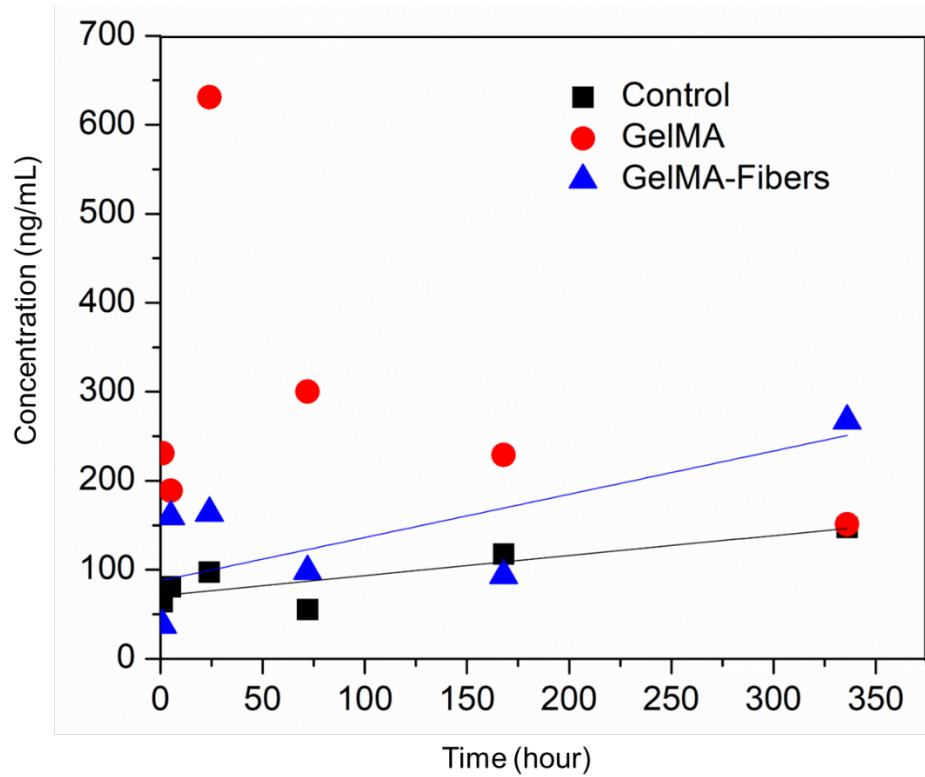

**Figure S3:** TGF- $\beta$  release from PRF core mixed in the hydrogel and PRF core mixed with hydrogel including microfibers.

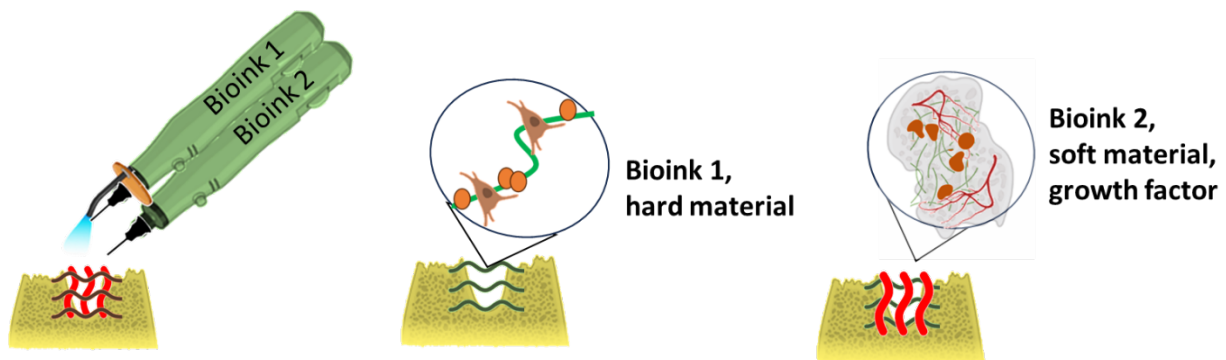

**Figure S4:** Schematic illustration of the second approach for using handheld injecting device with in-situ UV irradiation for layer-by-layer printing of bioink 1 and bioink 2 as multi-material bone filler.
